# Supplementary material
Source: PubMed Central journal article supplement (PMC7331827)
Supplement: NIHMS1596192-supplement-1.pdf [file NIHMS1596192-supplement-1.pdf]

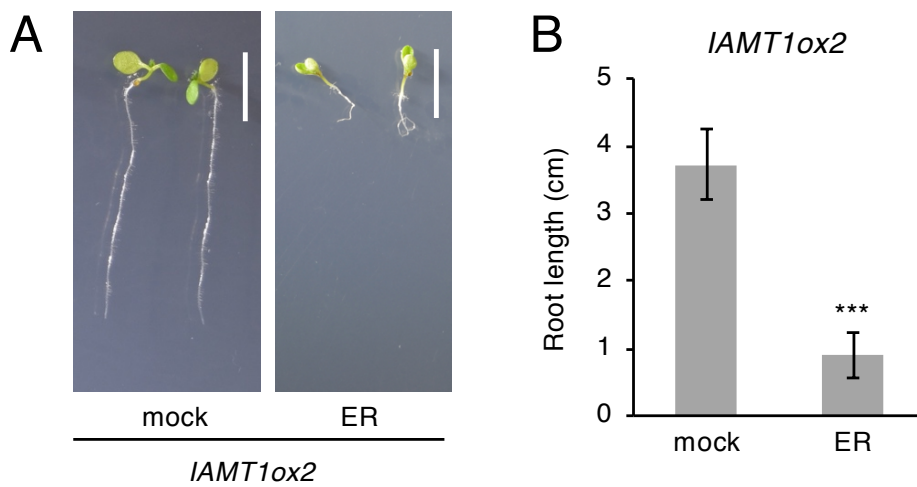

**Fig. S1. Phenotypes of *IAMT1ox2* plants.**

A) Phenotypes of *IAMT1ox2* plants. Plants were treated with mock or ER (2  $\mu$ M) for 4 days. Scale bars = 1 cm. B) Primary root length of *IAMT1ox2* plants. Plants were treated with mock or ER for 5 days. Differences between mock- and ER-treated plants are statistically significant at  $P < 0.05$  (\*\* $P < 0.001$ , Student's  $t$ -test).
